# Supplementary material for: The Effect of Climate Variability on Gray Whales (Eschrichtius robustus) within Their Wintering Areas
Source: PLoS One. 2015 Aug 26;10(8):e0134655. doi: 10.1371/journal.pone.0134655 (PMC4550241; doi:10.1371/journal.pone.0134655)
Supplement: S1 Dataset — (XLSX) [file pone.0134655.s001.xlsx]

## Sheet: Hoja1
	Ojo de Liebre Lagoon (OLL)						JAN-FEB mean						Bering sea	Max mother-calf pairs (feb) at others sites		Northbound total calf estimate
		Number of Mother-calf pairs (Feb)					OLL		BM	SIL	Regional indices
Year	Surveys (Feb)	Mean	Mean+SD	Mean-SD	Max	Min	SST	SSTA	SSTA	SSTA	NOI	PDO	LIFS	SDCH	SIL
1979													268
1980					557		17.21	1.1553	0.329379	0.721886	-6.9595	0.605	217
1981					525		17.3	1.2453	0.26438	0.831886	-2.812	1.025	218
1982					553		15.95	-0.1047	-0.34062	-0.0431151	0.3905	0.27	224
1983					463		17.6	1.5453	1.90938	1.46189	-10.288	0.85	238
1984							17.095	1.0403	1.37938	1.07688	3.6255	1.355	242
1985	2	487	507	467	502	473	15.885	-0.1697	-0.735621	-0.128114	3.341	1.105	242
1986							16.215	0.1603	-0.73062	-0.273115	-4.2025	1.365	237
1987	3	447	572	322	534	303	16.235	0.1803	0.35438	0.331886	-0.8495	1.815	229
1988	6	74	90	58	95	54	15.525	-0.5297	-0.0106202	0.0168853	1.5355	1.085	222
1989	5	71	86	56	91	49	15.25	-0.8047	-1.54562	-0.548115	5.9805	-0.985	264
1990							15.725	-0.3297	-0.31062	0.356885	1.989	-0.475	223
1991							16.445	0.3903	0.89438	0.761885	0.275	-1.605	220
1992							17.08	1.0253	0.98438	0.556885	-6.2775	0.18	205
1993							16.715	0.6603	1.05438	0.816885	-6.9705	0.12	233
1994							16.58	0.5253	0.77938	0.781885	0.319	0.9	200			945
1995							16.29	0.2353	0.504379	0.126885	-7.2425	-0.015	236			619
1996	6	422	486.662	357.338	512	360	16.855	0.8003	0.40938	0.701886	-1.392	0.67	262			1146
1997	3	538.333	619.428	457.239	626	466	15.975	-0.0797	-0.0806199	0.271885	1.797	0.255	232	83	126	1431
1998	1	530			530	530	17.72	1.6653	2.45438	2.07689	-9.523	1.195	224	12	52	1388
1999	2	164.5	233.089	95.9106	213	116	15.355	-0.6997	-0.575621	-0.553114	3.738	-0.49	199	32	17	427
2000	4	228.75	260.027	197.473	256	196	16.68	0.6253	-0.70562	0.246886	-2.0315	-1.415	231	16	45	279
2001	2	215.5	228.935	202.065	225	206	15.985	-0.0697	-0.10562	0.196886	1.661	0.445	228	25	29	256
2002	4	424	483.699	364.301	475	361	15.705	-0.3497	0.40438	0.151886	2.895	-0.185	244	97	43	842
2003	3	362.667	403.34	321.993	401	367	16.955	0.9003	0.839379	0.586885	-1.295	1.92	253			774
2004	3	697.333	863.322	531.344	889	601	16.41	0.3553	0.24438	0.406886	-0.3865	0.455	255			1528
2005	4	696.25	837.42	555.08	841	508	16.67	0.6153	0.35938	0.371885	-3.82	0.625	228			945
2006							16.215	0.1603	-0.10562	0.226885	3.189	0.845	224			1020
2007	2	247	269.627	224.373	263	231	16.35	0.2953	1.04438	0.686885	5.1325	0.025	235			404
2008	4	255.75	327.497	184.003	344	187	14.915	-1.1397	-1.38062	-1.05311	3.5175	-0.885	221			553
2009	4	302.75	342.686	262.814	335	245	16.33	0.2753	0.15438	0.276886	2.7975	-1.475	211			312
							SSTA	Sea surface temperature					LIFS	length of the ice-free season (days)
							SSTA	Sea surface temperature anomaly					SIL	San Ignacio Lagoon
							BM	Bahia Magdalena					SDCH	Santo Domingo Channel north of BM
							SIL	San Ignacio logoon
